# Supplementary material for: High-performance transparent hybrid (ionic and dielectric) gel actuator system based on poly(vinyl chloride)/dibutyl adipate/ionic liquid gels operating at a low applied voltage
Source: Royal Society of Chemistry journal article supplement (doi:10.1039/d4ma00143e), 2024-01-01
Supplement: d4ma00143e1.pdf [file d4ma00143e1.pdf]

## Supporting Information

**High-performance transparent hybrid (ionic and dielectric) gel actuator system based on poly(vinyl chloride)/dibutyl adipate/ionic liquid gels operating at a low applied voltage**

Naohiro Terasawa<sup>\*a</sup> and Hirosato Monobe<sup>a</sup>

<sup>a</sup>Nanomaterial Research Institute, National Institute of Advanced Industrial Science and Technology (AIST), 1-8-31 Midorigaoka, Ikeda, Osaka 563-8577, Japan.

\*Corresponding author. Tel: +81-72-751-7914, Fax: +81-72-751-8370

E-mail: [terasawa-naohiro@aist.go.jp](mailto:terasawa-naohiro@aist.go.jp)

**Table S1.** Young's moduli (MPa) of the transparent PVC/DBA/IL and PVC/DBA gels.

| <b>IL</b>          | <b>Young's moduli<br/>(MPa)</b> |
|--------------------|---------------------------------|
| <b>EMI[TFSI]</b>   | <b>0.36</b>                     |
| <b>EMI[FSI]</b>    | <b>0.31</b>                     |
| <b>THTDP[TFSI]</b> | <b>0.25</b>                     |
| <b>THTDP[Cl]</b>   | <b>0.27</b>                     |
| <b>None</b>        | <b>0.18</b>                     |

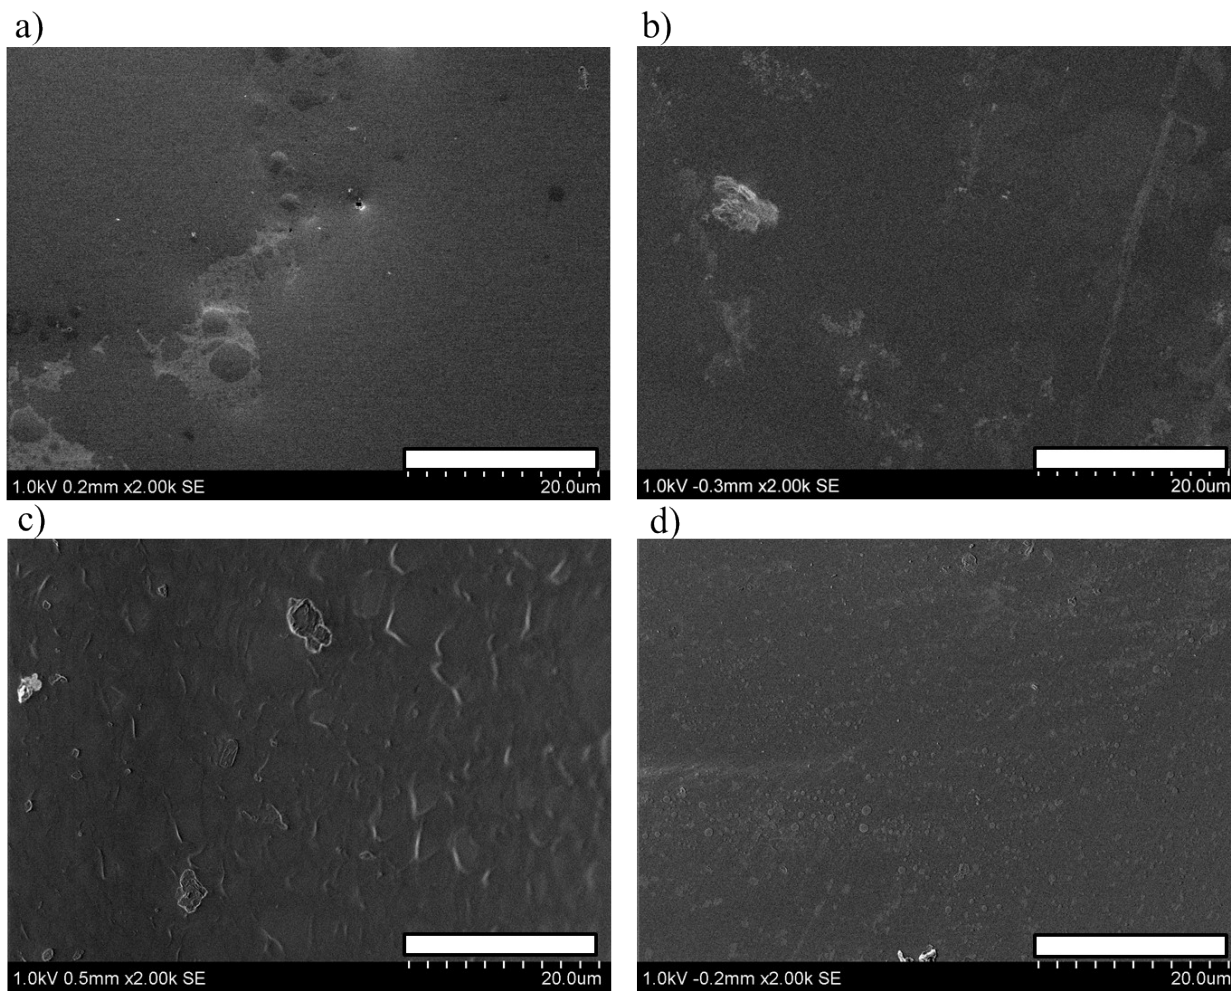

**Figure S1.** (a, c) Planar and (b, d) cross-sectional SEM images of (a, b) PVC/DBA/IL gel and (c, d) PVC/DBA gel. Magnification:  $\times 2000$ .

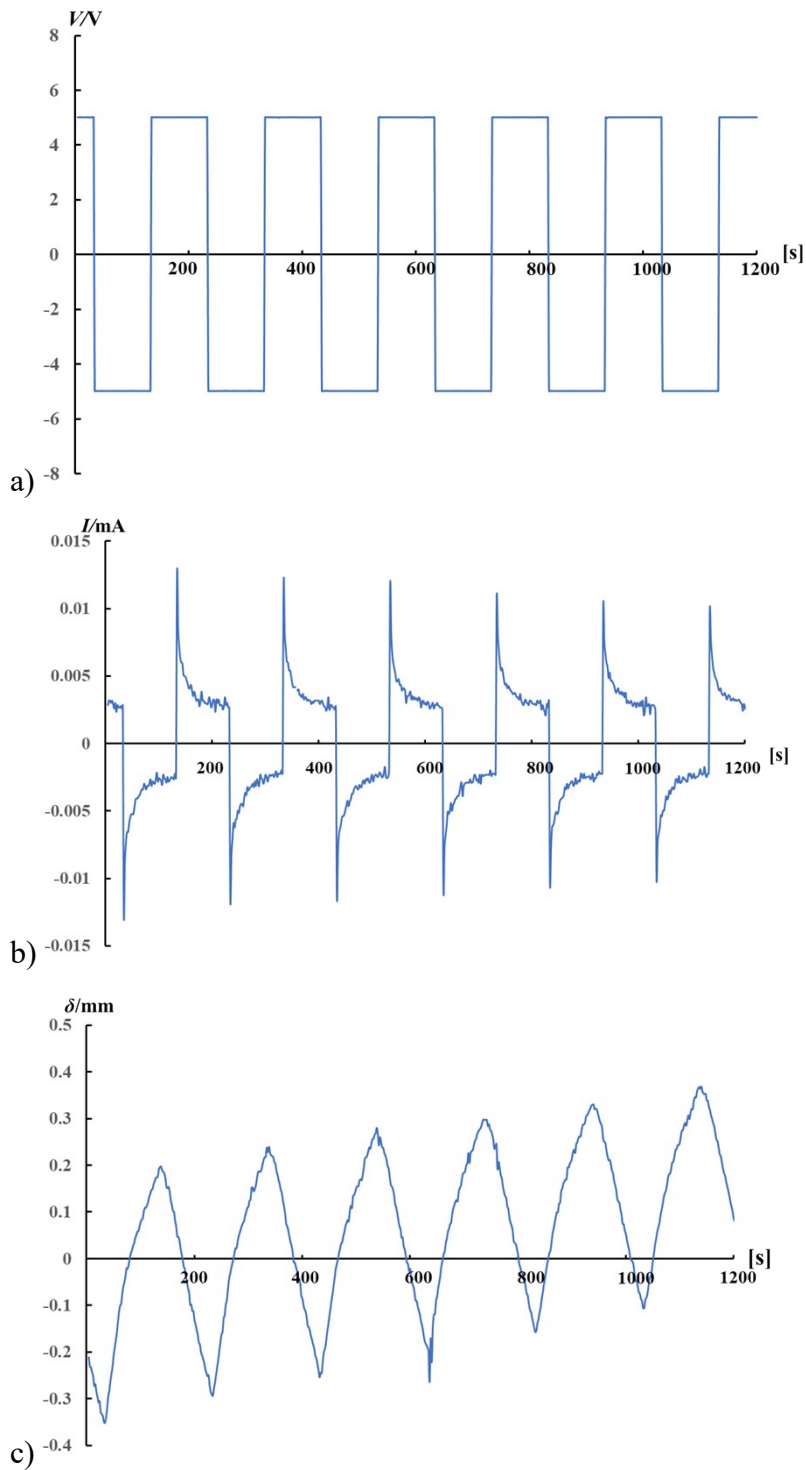

**Figure S2.** Time-dependent (a) voltage  $V$  (V), (b) current  $I$  (mA), and (c) displacement  $\delta$  (mm) for the transparent PVC/DBA/TFSI gel actuator under an applied square-wave voltage ( $\pm 5$  V, 0.005 Hz).

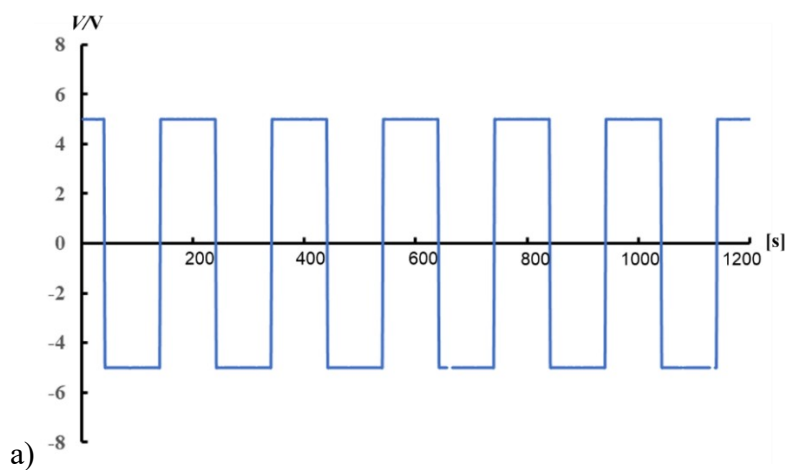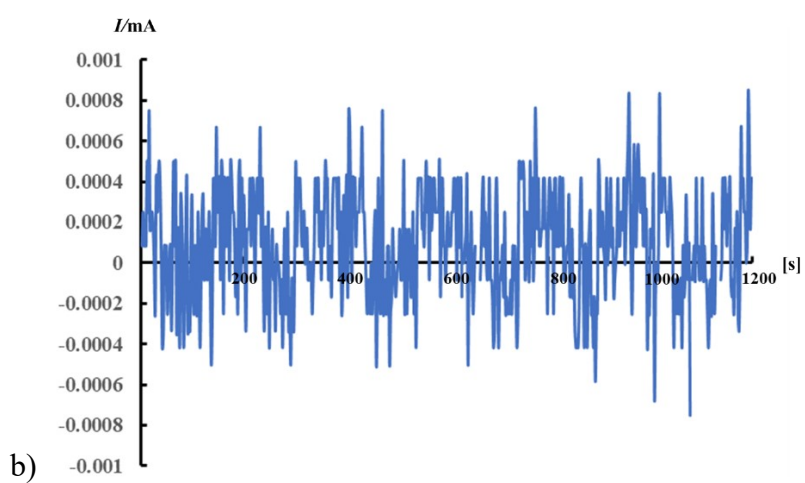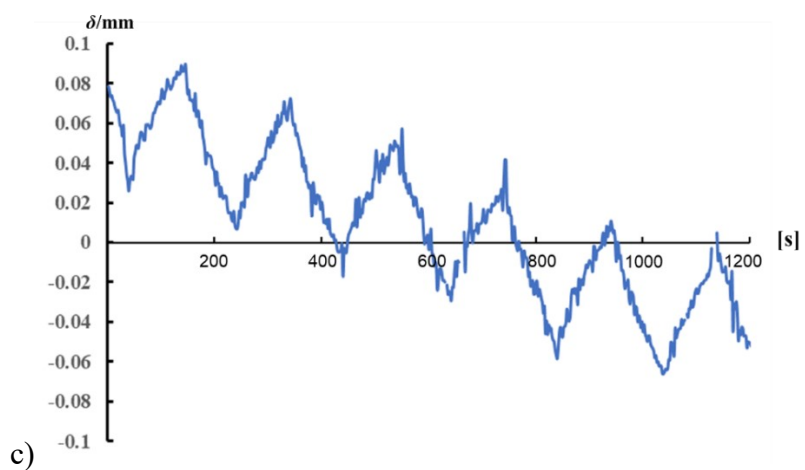

**Figure S3.** Time-dependent (a) voltage  $V$  (V), (b) current  $I$  (mA), and (c) displacement  $\delta$  (mm) for the transparent PVC/DBA gel actuator under an applied square-wave voltage ( $\pm 5$  V, 0.005 Hz).
